# Supplementary material for: Towards improved HIV-microbicide activity through the co-encapsulation of NRTI drugs in biocompatible metal organic framework nanocarriers
Source: Royal Society of Chemistry journal article supplement (doi:10.1039/c7tb01933e), 2017-01-01
Supplement: c7tb01933e1.pdf [file c7tb01933e1.pdf]

## **SUPPORTING INFORMATION**

### **Towards an improved HIV-microbicide activity through the co-encapsulation of NRTI drugs in biocompatible Metal Organic Frameworks nanocarriers**

M.T. Marcos-Almaraz<sup>1</sup>, R. Gref<sup>2,3</sup>, V. Agostoni<sup>2</sup>, C. Kreuz<sup>4</sup>, P. Clayette<sup>4</sup>, C. Serre<sup>1,5</sup>, P. Couvreur<sup>2</sup>,  
P. Horcajada<sup>1,6\*</sup>

<sup>1</sup> Institut Lavoisier, Université de Versailles St-Quentin, UMR CNRS 8180, 45 avenue des Etats-Unis, 78035 Versailles Cedex, France.

<sup>2</sup> Institut Galien Paris-Sud, UMR 8612, CNRS, Université Paris-Sud, Université Paris Saclay, Faculté de Pharmacie, 5 rue Jean-Baptiste Clément, F-92296 Châtenay-Malabry Cedex, France.

<sup>3</sup> Institut de Sciences Moléculaires, UMR 8214, CNRS, Université Paris-Sud, Université Paris Saclay, Orsay, France.

<sup>4</sup> Laboratoire de Neurovirologie, Bertin-Pharma, CEA, 18 route du Panorama, B.P. 6, 92265 Fontenay aux Roses Cedex, France.

<sup>5</sup> Institut des Matériaux Poreux de Paris, FRE 2000 CNRS, Ecole Normale Supérieure, Ecole Supérieure de Physique et de Chimie Industrielles, PSL Research University, 75005, Paris, France.

<sup>6</sup> IMDEA Energy, Avda. Ramón de la Sagra 3, 28935 Móstoles-Madrid, Spain.

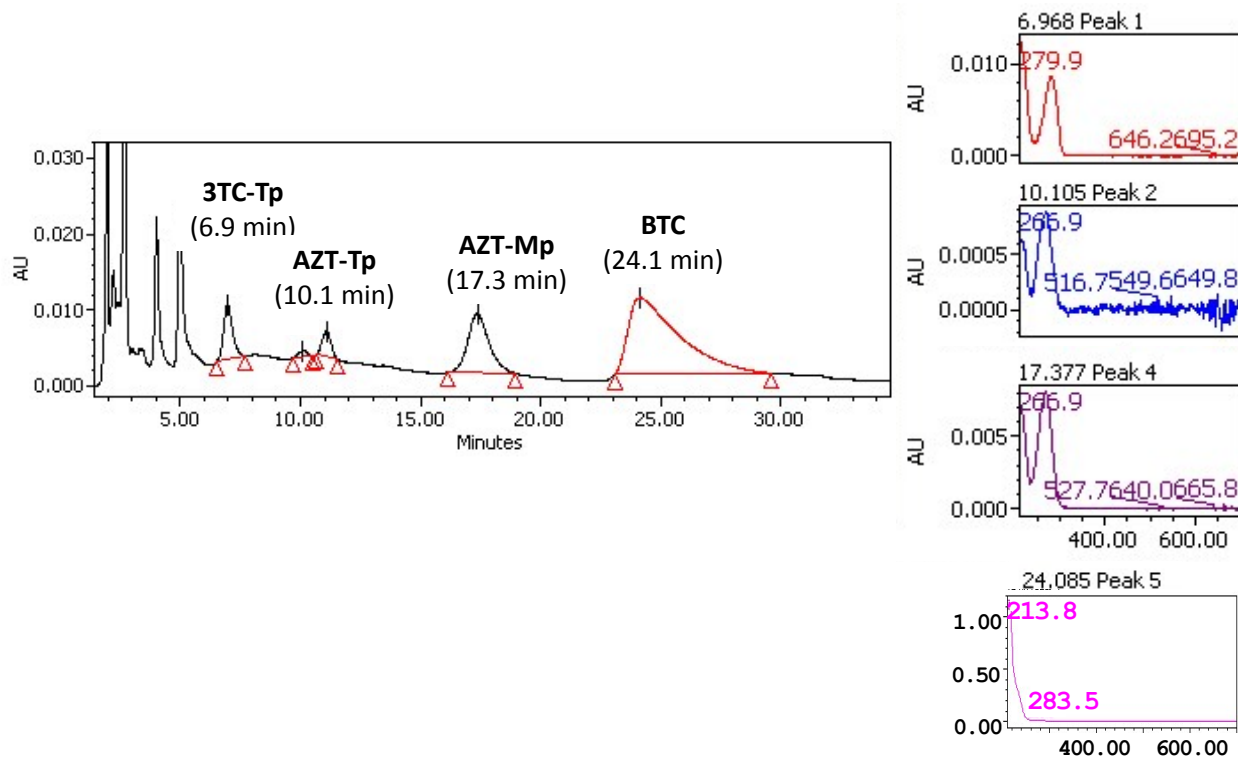

**Figure S1.** Chromatogram and absorption spectra of 3TC-Tp, AZT-Tp, AZT-Mp and BTC released from AZT-Tp/3TC-TP loaded MIL-100(Fe) NPs and incubated during 24 h in PBS supplemented with 10% calf serum

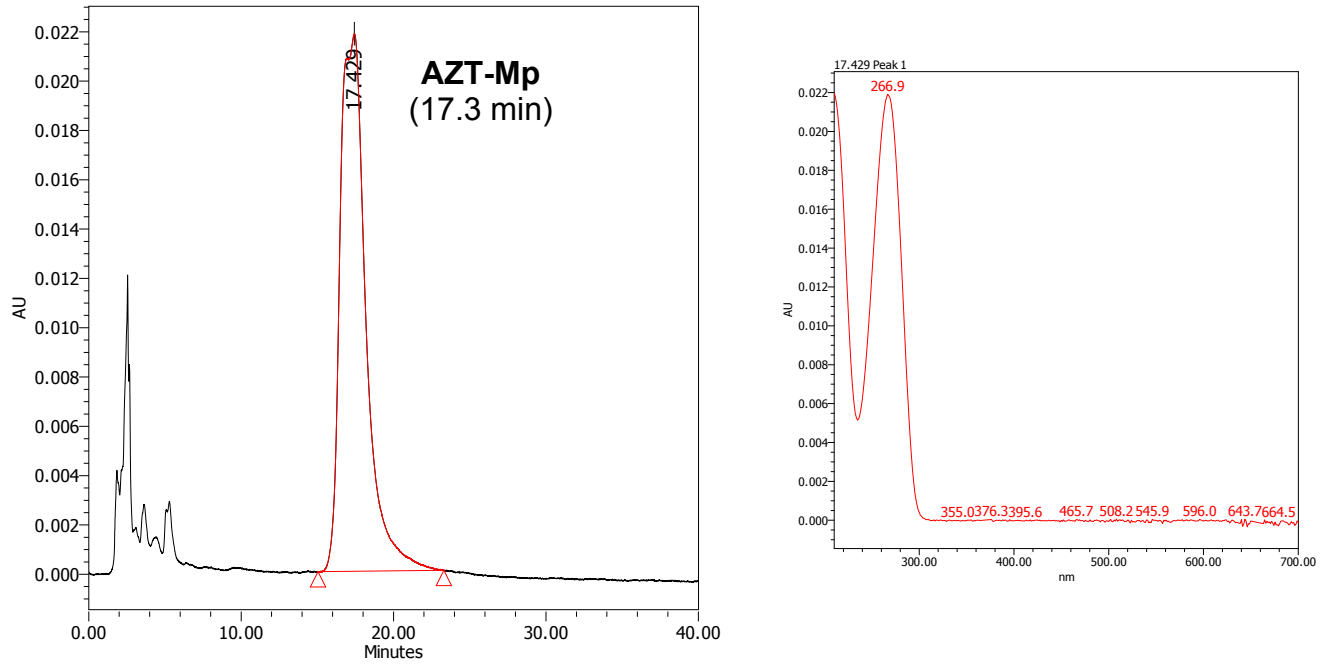

**Figure S2.** Chromatogram and absorption spectrum of commercial AZT-Mp (50 mg.mL<sup>-1</sup>).

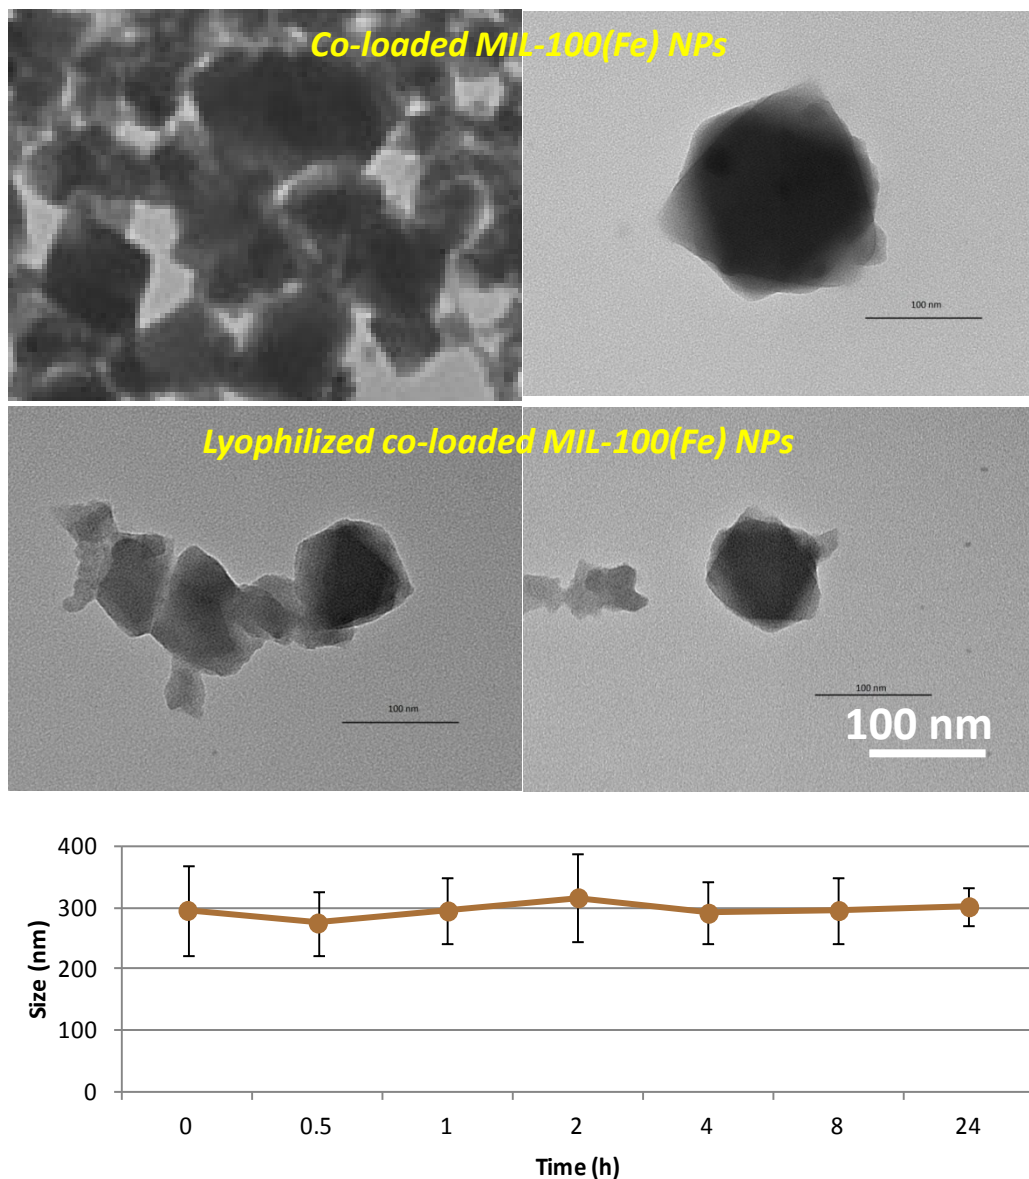

**Figure S3.** TEM images of MIL-100(Fe) NPs just after encapsulation of AZT-Tp and 3TC-Tp (on the top) and after 2 months-storage at room temperature conditions upon lyophilization (on the middle). Scale bar = 100 nm. On the bottom: Colloidal stability of the co-loaded MIL-100(Fe) NPs just reconstituted in PBS-FBS after their lyophilization and storage for 2 months ( $n = 3$ ).

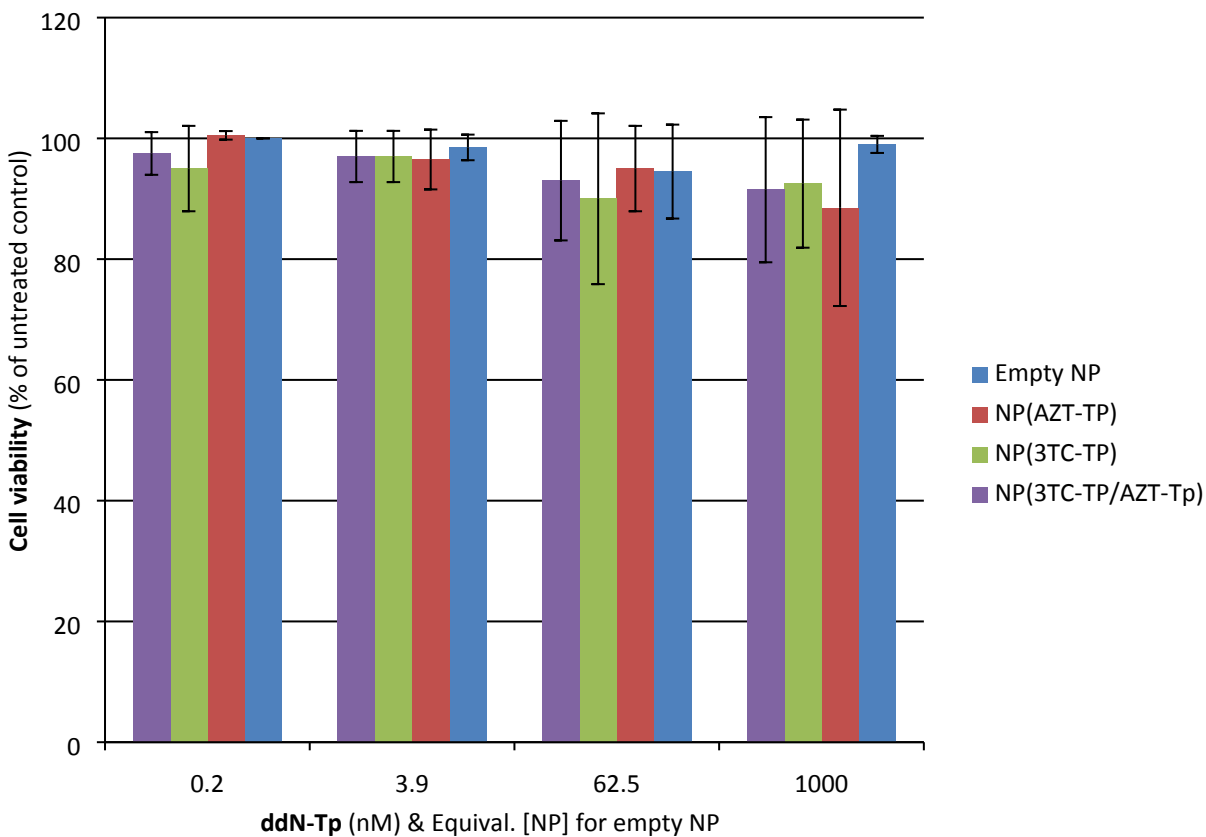

**Figure S4.** Cell viability of macrophages treated with empty or co-loaded nanoMOFs. Data obtained from two independent experiments ( $n = 2$ ), performed each in triplicate. Results are expressed as percentage of cell viability in comparison to untreated control.
